# Supplementary material
Source: MDPI journal article supplement (https://www.mdpi.com/2073-4441/15/9/1675)
Supplement: s1 [file s1]

**Table S1.** Station ID, latitude(°), longitude(°) and plant functional type of the 36 Selected flux stations

| SITE_ID | LAT      | LONG      | PFT |
|---------|----------|-----------|-----|
| BE-Lon  | 50.5516  | 4.7462    | CRO |
| DE-Geb  | 51.0997  | 10.9146   | CRO |
| DE-Kli  | 50.8931  | 13.5224   | CRO |
| FR-Gri  | 48.8442  | 1.9519    | CRO |
| IT-CA2  | 42.3772  | 12.026    | CRO |
| US-ARM  | 36.6058  | -97.4888  | CRO |
| US-Ne1  | 41.1651  | -96.4766  | CRO |
| US-Ne2  | 41.1649  | -96.4701  | CRO |
| US-Ne3  | 41.1797  | -96.4397  | CRO |
| IT-CA1  | 42.3804  | 12.0266   | DBF |
| IT-CA3  | 42.38    | 12.0222   | DBF |
| IT-Ro2  | 42.3903  | 11.9209   | DBF |
| US-MMS  | 39.3232  | -86.4131  | DBF |
| US-WCr  | 45.8059  | -90.0799  | DBF |
| CA-SF1  | 54.485   | -105.8176 | ENF |
| FI-Sod  | 67.3624  | 26.6386   | ENF |
| FR-LBr  | 44.7171  | -0.7693   | ENF |
| NL-Loo  | 52.1666  | 5.7436    | ENF |
| SITE_ID | LAT      | LONG      | PFT |
| RU-Fyo  | 56.4615  | 32.9221   | ENF |
| US-Blo  | 38.8953  | -120.6328 | ENF |
| AU-Emr  | -23.8587 | 148.4746  | GRA |
| AU-Stp  | -17.1507 | 133.3502  | GRA |
| CH-Cha  | 47.2102  | 8.4104    | GRA |
| CN-Cng  | 44.5934  | 123.5092  | GRA |
| DE-Gri  | 50.95    | 13.5126   | GRA |
| RU-Ha1  | 54.7252  | 90.0022   | GRA |
| US-AR1  | 36.4267  | -99.42    | GRA |
| US-AR2  | 36.6358  | -99.5975  | GRA |
| US-Var  | 38.4133  | -120.9508 | GRA |
| US-Wkg  | 31.7365  | -109.9419 | GRA |
| AU-ASM  | -22.283  | 133.249   | SAV |
| AU-Cpr  | -34.0021 | 140.5891  | SAV |
| AU-DaS  | -14.1593 | 131.3881  | SAV |
| AU-Dry  | -15.2588 | 132.3706  | SAV |
| SD-Dem  | 13.2829  | 30.4783   | SAV |

|        |         |          |     |
|--------|---------|----------|-----|
| SN-Dhr | 15.4028 | -15.4322 | SAV |
|--------|---------|----------|-----|
